# Supplementary material for: Effects of Hydrologic Regime Changes on a Taxonomic and Functional Trait Structure of Earthworm Communities in Mountain Wetlands
Source: MDPI journal article supplement (doi:10.3390/biology12030482), 2023-03-21
Supplement: s1 [file s1]

# Effects of hydrologic regime changes on taxonomic and functional trait structure of earthworm communities in mountain wetlands

Václav Pižl<sup>1</sup>, Maria Sterzyńska<sup>2</sup>, Karel Tajovský<sup>1</sup>, Josef Starý<sup>1</sup>, Paweł Nicia<sup>3</sup>, Paweł Zadrozny<sup>3</sup>, and Romualda Bejger<sup>4</sup>

Table S2. Earthworm density (ind. m<sup>-2</sup>) in various hydrologic conditions (HC) of mountain fens

|   | HC           | Acalig | Arosea | Docta | Drubid | Eisluc | Etetra | Lumrub | Octarg | Octtra | Otyrt  |
|---|--------------|--------|--------|-------|--------|--------|--------|--------|--------|--------|--------|
| 1 | Natural      | 0.89   | 5.33   | 16.89 | 0.89   | 0.00   | 0.00   | 3.56   | 0.00   | 0.00   | 14.22  |
| 2 | Natural      | 14.22  | 3.56   | 17.78 | 3.56   | 0.00   | 0.00   | 3.56   | 0.00   | 0.00   | 26.67  |
| 3 | Natural      | 6.22   | 8.89   | 44.44 | 8.89   | 3.56   | 18.96  | 8.89   | 0.89   | 2.67   | 10.67  |
| 4 | Semi-natural | 0.00   | 0.89   | 38.22 | 4.44   | 1.78   | 9.48   | 0.00   | 16.89  | 0.89   | 8.00   |
| 5 | Semi-natural | 19.56  | 0.89   | 78.22 | 5.33   | 0.00   | 0.00   | 0.89   | 0.00   | 0.00   | 2.67   |
| 6 | Semi-natural | 7.11   | 3.56   | 66.67 | 2.67   | 8.89   | 47.41  | 0.89   | 0.00   | 0.89   | 3.56   |
| 7 | Degraded     | 10.67  | 4.44   | 64.89 | 0.00   | 0.00   | 0.00   | 0.89   | 0.00   | 0.00   | 107.56 |
| 8 | Degraded     | 11.56  | 1.78   | 50.67 | 4.44   | 0.00   | 0.00   | 0.00   | 26.67  | 0.00   | 5.33   |
| 9 | Degraded     | 4.44   | 9.78   | 64.89 | 2.67   | 8.00   | 42.67  | 10.67  | 0.00   | 0.00   | 4.44   |

## Earthworm species abbrevtaion

| Species                        | Abbreviation |
|--------------------------------|--------------|
| <i>Aporrectodea caliginosa</i> | Acalig       |
| <i>Aporrectodea rosea</i>      | Arosea       |

|                                |        |
|--------------------------------|--------|
| <i>Dendrobaena octaedra</i>    | Docta  |
| <i>Dendrodrilus rubidus</i>    | Drubid |
| <i>Eisenia lucens</i>          | Eisluc |
| <i>Eiseniella tetraedra</i>    | Etetra |
| <i>Lumbricus rubellus</i>      | Lumrub |
| <i>Octodrilus argoviensis</i>  | Octarg |
| <i>Octodrilus transpadanus</i> | Octtra |
| <i>Octolasion tyrtaeum</i>     | Olact  |
