# Supplementary material for: Effects of Hydrologic Regime Changes on a Taxonomic and Functional Trait Structure of Earthworm Communities in Mountain Wetlands
Source: MDPI journal article supplement (doi:10.3390/biology12030482), 2023-03-21
Supplement: s1 [file s1]

# Effects of hydrologic regime changes on taxonomic and functional trait structure of earthworm communities in mountain wetlands

Václav Pižl<sup>1</sup>, Maria Sterzyńska<sup>2</sup>, Karel Tajovský<sup>1</sup>, Josef Starý<sup>1</sup>, Paweł Nicia<sup>3</sup>, Paweł Zadrożny<sup>3</sup>, and Romualda Bejger<sup>4</sup>

Table S1. Classification of earthworm traits to the attribute classes

| Species                        | Abb    | V-D | Lmin | Lmax | Prost | Quisc | Tweek | Coc-ye | Hwidth | Disp | Higr | C/Npref | pHtol |
|--------------------------------|--------|-----|------|------|-------|-------|-------|--------|--------|------|------|---------|-------|
| <i>Aporrectodea caliginosa</i> | Acalig | 3   | 2    | 3    | 2     | 3     | 3     | 3      | 3      | 1    | 3    | 1       | 3     |
| <i>Aporrectodea rosea</i>      | Arosea | 3   | 1    | 3    | 2     | 3     | 3     | 3      | 3      | 3    | 3    | 1       | 3     |
| <i>Dendrobaena octaedra</i>    | Docta  | 1   | 1    | 2    | 1     | 1     | 1     | 1      | 3      | 1    | 2    | 3       | 1     |
| <i>Dendrodrilus rubidus</i>    | Drubid | 1   | 1    | 2    | 1     | 1     | 1     | 1      | 3      | 1    | 2    | 3       | 1     |
| <i>Eisenia lucens</i>          | Eisluc | 1   | 1    | 3    | 1     | 1     | 1     | 3      | 1      | 3    | 2    | 3       | 1     |
| <i>Eiseniella tetraedra</i>    | Etetra | 1   | 1    | 2    | 1     | 1     | 1     | 1      | 1      | 1    | 1    | 2       | 3     |
| <i>Lumbricus rubellus</i>      | Lumrub | 2   | 2    | 3    | 3     | 1     | 1     | 1      | 3      | 1    | 2    | 3       | 1     |
| <i>Octodrilus argoviensis</i>  | Octarg | 2   | 1    | 2    | 3     | 1     | 3     | 3      | 1      | 2    | 1    | 3       | 1     |
| <i>Octodrilus transpadanus</i> | Octtra | 3   | 1    | 3    | 2     | 3     | 3     | 3      | 1      | 2    | 1    | 3       | 3     |
| <i>Octolasion tyrtaeum</i>     | Otyrt  | 3   | 1    | 3    | 1     | 3     | 3     | 3      | 3      | 3    | 2    | 2       | 3     |

## Earthworm traits abbreviation

| Trait                        | Abbreviation |
|------------------------------|--------------|
| vertical distribution        | V-D          |
| min. length at maturity (mm) | Lmin         |
| max. length at maturity (mm) | Lmax         |
| prostomium                   | Prost        |
| quiescence                   | Quisc        |
| time to maturity (weeks)     | Tweeks       |
| cocoons (n/year)             | Coc-ye       |
| habitat width                | Hwidth       |
| dispersal potential          | Disp         |
| hydrophily                   | Higr         |
| C/N soil preference          | C/Npref      |
| low pH tolerance             | pHtol        |
